# Supplementary material for: Diverse modes of H3K36me3-guided nucleosomal deacetylation by Rpd3S
Source: Nature. 2023 Jul 19;620(7974):669–75. doi: 10.1038/s41586-023-06349-1 (PMC10432269; doi:10.1038/s41586-023-06349-1)
Supplement: Supplementary file 4 — This file contains Supplementary Tables 1 and 2. [file 41586_2023_6349_MOESM4_ESM.xlsx]

## Sheet: Sheet1
Rpd3S complex inter-crosslinks									Rpd3S complex intra-crosslinks
Linked Site	Total Spec	Best Svm Score	Peptide	Peptide mass					Linked Site	Total Spec	Best Svm Score	Peptide	Peptide mass
Eaf3(229)-Rco1(365)	5	2.55913e-09	LKSVLVDDWEYVTK(2)-ETFPAVKTGSR(7)	3024.59					Eaf3(108)-Eaf3(116)	3	3.08421e-05	AYNEENIAMKK(10)-LANEAKEAK(6)	2421.23
Eaf3(229)-Rco1(501)	8	1.97454e-11	LKSVLVDDWEYVTK(2)-KNQLYYEPLQK(1)	3255.72					Eaf3(108)-Eaf3(116)	3	0.00897791	AYNEENIAMKKR(10)-LANEAKEAKK(6)	2705.43
Eaf3(241)-Rco1(365)	2	5.89323e-06	SVLVDDWEYVTKDK(12)-ETFPAVKTGSR(7)	3026.54					Eaf3(108)-Eaf3(116)	1	0.223555	AYNEENIAMKKR(10)-RLANEAKEAK(7)	2733.44
Eaf3(311)-Rco1(208)	3	6.70662e-07	LQYDELLKK(8)-KLSNIR(1)	2017.17					Eaf3(108)-Eaf3(119)	2	0.000306496	AYNEENIAMKKR(10)-LANEAKEAKK(9)	2705.43
Rco1(107)-Sin3(873)	2	0.0340096	LNEPSTISEDSKVSVTGLPLNK(12)-VYDKER(4)	3274.71					Eaf3(109)-Eaf3(119)	1	0.0134159	AYNEENIAMKKR(11)-LANEAKEAKK(9)	2705.43
Rco1(107)-Sin3(901)	2	0.000130115	LNEPSTISEDSKVSVTGLPLNK(12)-QKDEEWR(2)	3455.75					Eaf3(116)-Eaf3(120)	1	3.07862e-08	LANEAKEAK(6)-KSLLEQQK(1)	2084.16
Rco1(117)-Sin3(901)	3	2.17278e-06	VSVTGLPLNKGPSEK(10)-QKDEEWR(2)	2653.38					Eaf3(119)-Eaf3(116)	1	0.357874	RLANEAKEAKK(10)-LANEAKEAK(6)	2368.32
Rco1(157)-Rpd3(60)	1	0.0329831	FTQVPKNFQDLNR(6)-KMEIYR(1)	2583.34					Eaf3(156)-Eaf3(145)	2	0.000190403	SNASISKSTSQSFLTSSVSGR(7)-RKGDSR(2)	2986.52
Rco1(157)-Sin3(914)	3	0.0047332	FTQVPKNFQDLNR(6)-EWNKVWR(4)	2761.42					Eaf3(26)-Eaf3(1)	1	0.0171262	CLAFHGPLMYEAKILK(13)-MVDLEQEFALGGR(1)	3492.77
Rco1(157)-Ume1(459)	1	1.72635e-06	FTQVPKNFQDLNR(6)-EVGAAKS(6)	2405.25					Eaf3(311)-Eaf3(315)	1	7.75395e-06	LQYDELLKK(8)-SSKDQK(3)	1979.07
Rco1(168)-Rpd3(60)	3	2.03706e-05	NDLKTFLTENMTEESNIR(4)-KMEIYR(1)	3131.54					Eaf3(311)-Eaf3(318)	1	0.0177385	LQYDELLKK(8)-DQKPLVPIR(3)	2352.35
Rco1(215)-Eaf3(318)	1	0.101622	TKIILSTNATYDSK(2)-DQKPLVPIR(3)	2757.54					Eaf3(315)-Eaf3(311)	3	0.000569478	SSKDQKPLVPIR(3)-LQYDELLKK(8)	2654.51
Rco1(245)-Ume1(126)	1	0.318895	STSNASEKIFR(8)-WEFKGETIAK(4)	2585.32					Eaf3(45)-Eaf3(57)	4	0.0433426	MYTSIPNDKPGGSSQATK(9)-EIKPQK(3)	2761.41
Rco1(358)-Eaf3(241)	4	2.49278e-05	QFQLPNYIKETFPAVK(9)-SVLVDDWEYVTKDK(12)	3756.94					Rco1(107)-Rco1(245)	1	0.309468	LNEPSTISEDSKVSVTGLPLNK(12)-STSNASEKIFR(8)	3704.92
Rco1(378)-Eaf3(227)	1	0.270914	GQYSDENDKIPLTDR(9)-ISLQIPIKLK(8)	3040.66					Rco1(117)-Rco1(157)	3	6.59169e-05	VSVTGLPLNKGPSEK(10)-FTQVPKNFQDLNR(6)	3269.75
Rco1(378)-Eaf3(229)	2	0.00707435	GQYSDENDKIPLTDR(9)-LKSVLVDDWEYVTK(2)	3582.78					Rco1(117)-Rco1(157)	1	0.00832296	VSVTGLPLNKGPSEKIKR(10)-FTQVPKNFQDLNR(6)	3667.03
Rco1(378)-Eaf3(241)	1	0.233966	GQYSDENDKIPLTDR(9)-SVLVDDWEYVTKDK(12)	3584.73					Rco1(117)-Rco1(245)	1	0.529436	VSVTGLPLNKGPSEKIKR(10)-STSNASEKIFR(8)	3299.83
Rco1(413)-Sin3(679)	2	0.000722262	LDSYNPDTHIDSNSGKFLICYK(16)-YIGNKHLYTEFLK(5)	4350.14					Rco1(117)-Rco1(52)	4	8.9464e-10	VSVTGLPLNKGPSEK(10)-KIITSEGIER(1)	2808.57
Rco1(413)-Sin3(946)	4	0.000472151	LDSYNPDTHIDSNSGKFLICYK(16)-LLTTKQLISEISSIK(5)	4398.28					Rco1(117)-Rco1(52)	2	0.00100175	VSVTGLPLNKGPSEKIKR(10)-KIITSEGIER(1)	3205.85
Rco1(413)-Sin3(962)	2	0.00315175	LDSYNPDTHIDSNSGKFLICYK(16)-VDQTNKK(6)	3556.73					Rco1(117)-Rco1(90)	2	0.048034	VSVTGLPLNKGPSEK(10)-DSKGNIIK(3)	2537.42
Rco1(500)-Eaf3(145)	2	0.0144669	LINKKNQLYYEPLQK(4)-RKGDSR(2)	2747.52					Rco1(150)-Rco1(157)	1	0.224751	NLGGQSNNSEMTLVPSKR(17)-FTQVPKNFQDLNR(6)	3675.85
Rco1(52)-Sin3(873)	2	0.18309	KIITSEGIER(1)-VYDKER(4)	2092.13					Rco1(157)-Rco1(49)	2	0.0381072	FTQVPKNFQDLNR(6)-LSSQNVNYDLKR(11)	3180.64
Rco1(52)-Sin3(922)	1	8.84544e-06	KIITSEGIER(1)-ELEQKVFFK(5)	2450.35					Rco1(157)-Rco1(52)	2	1.17529e-05	FTQVPKNFQDLNR(6)-KIITSEGIER(1)	2889.55
Rco1(52)-Ume1(459)	1	0.19525	KIITSEGIER(1)-EVGAAKS(6)	1944.06					Rco1(157)-Rco1(90)	2	7.46776e-07	FTQVPKNFQDLNR(6)-DSKGNIIK(3)	2618.39
Rco1(548)-Sin3(679)	1	0.00346152	ITQIDENSIKYDFFDK(10)-YIGNKHLYTEFLK(5)	3738.89					Rco1(168)-Rco1(157)	4	5.7736e-07	NDLKTFLTENMTEESNIR(4)-FTQVPKNFQDLNR(6)	3898.93
Rco1(565)-Sin3(729)	4	3.11734e-08	KLFQFQESLIDK(1)-NFVGYQEKTK(8)	2846.5					Rco1(215)-Rco1(208)	2	1.72032e-06	TKIILSTNATYDSK(2)-KLSNIR(1)	2422.36
Rpd3(2)-Sin3(1170)	2	1.34448e-06	VYEATPFDPITVK(1)-VTKEINTR(3)	2577.38					Rco1(215)-Rco1(321)	3	0.000393766	TKIILSTNATYDSK(2)-KIESNFIK(1)	2670.46
Rpd3(2)-Sin3(1170)	5	6.72368e-11	VYEATPFDPITVKPSDK(1)-VTKEINTR(3)	3004.59					Rco1(215)-Rco1(52)	3	3.15583e-10	TKIILSTNATYDSK(2)-KIITSEGIER(1)	2837.55
Rpd3(2)-Sin3(1170)	1	0.0272024	VYEATPFDPITVKPSDKRR(1)-VTKEINTR(3)	3316.79					Rco1(227)-Rco1(245)	2	0.00345797	IILSTNATYDSKSK(12)-STSNASEKIFR(8)	2917.52
Rpd3(336)-Sin3(1170)	2	6.03759e-06	TWCFETGLLNNVVLDKDLPYNEYYEYYGPDYK(16)-VTKEINTR(3)	5079.43					Rco1(227)-Rco1(321)	1	1.63119e-05	IILSTNATYDSKSK(12)-KIESNFIK(1)	2656.44
Rpd3(352)-Sin3(1170)	5	2.05814e-05	DLPYNEYYEYYGPDYKLSVR(16)-VTKEINTR(3)	3644.78					Rco1(237)-Rco1(227)	1	0.0112406	LFGQNSIKSTSNASEK(8)-IILSTNATYDSKSK(12)	3388.75
Rpd3(352)-Sin3(1235)	1	0.0904231	DLPYNEYYEYYGPDYKLSVR(16)-QAYNNKAFK(6)	3767.79					Rco1(245)-Rco1(229)	1	0.00618306	STSNASEKIFR(8)-SKLFGQNSIK(2)	2498.32
Sin3(1244)-Rco1(49)	1	0.00178918	LYTIDKVTQSLVK(6)-LSSQNVNYDLKR(11)	3081.68					Rco1(245)-Rco1(52)	3	8.49638e-05	STSNASEKIFR(8)-KIITSEGIER(1)	2522.35
Sin3(1244)-Rco1(52)	2	8.66243e-07	LYTIDKVTQSLVK(6)-KIITSEGIER(1)	2790.59					Rco1(250)-Rco1(208)	3	0.0170698	DKNNSTIDFENEDFCSACNQSGSFLCCDTCPK(2)-KLSNIR(1)	4688.01
Sin3(1244)-Ume1(126)	2	1.14853e-08	LYTIDKVTQSLVK(6)-WEFKGETIAK(4)	2853.56					Rco1(250)-Rco1(245)	3	0.00383429	DKNNSTIDFENEDFCSACNQSGSFLCCDTCPK(2)-STSNASEKIFR(8)	5197.19
Sin3(1333)-Rco1(133)	2	0.0094152	ADEDKWKYYVTSYALPHPTEGIPHEK(5)-KNLGGQSNNSEMTLVPSK(1)	5115.5					Rco1(250)-Rco1(52)	2	4.68478e-05	DKNNSTIDFENEDFCSACNQSGSFLCCDTCPK(2)-KIITSEGIER(1)	5103.21
Sin3(1356)-Ume1(13)	1	0.00520571	LKIPFLER(2)-IKNEEFK(2)	2060.18					Rco1(321)-Rco1(208)	2	0.000185881	KIESNFIK(1)-KLSNIR(1)	1846.08
Sin3(1413)-Rco1(157)	2	0.00013158	KATNKYPTIANDNTQK(1)-FTQVPKNFQDLNR(6)	3550.83					Rco1(328)-Rco1(320)	1	0.0616558	IESNFIKQNNNVK(7)-IFINNSMATLKK(11)	3064.65
Sin3(1417)-Rco1(157)	1	0.000618837	ATNKYPTIANDNTQK(4)-FTQVPKNFQDLNR(6)	3422.73					Rco1(358)-Rco1(378)	1	5.83041e-05	QFQLPNYIKETFPAVK(9)-GQYSDENDKIPLTDR(9)	3810.92
Sin3(1417)-Ume1(459)	1	0.186777	ATNKYPTIANDNTQK(4)-EVGAAKS(6)	2477.25					Rco1(365)-Rco1(463)	4	0.0102595	ETFPAVKTGSR(7)-NLGSKWK(5)	2162.16
Sin3(1440)-Ume1(459)	2	1.76828e-05	ELISKFLDCAVGLR(5)-EVGAAKS(6)	2419.29					Rco1(365)-Rco1(52)	2	0.246765	ETFPAVKTGSR(7)-KIITSEGIER(1)	2475.35
Sin3(1473)-Ume1(197)	1	0.288881	DSIAKTSAGNQGIESETEK(5)-PCVDFAISNDSKTLTVTK(12)	4098.01					Rco1(378)-Rco1(227)	1	0.164954	GQYSDENDKIPLTDR(9)-IILSTNATYDSKSK(12)	3428.71
Sin3(1473)-Ume1(267)	2	5.09467e-07	DSIAKTSAGNQGIESETEK(5)-FWGNEIGKK(8)	3180.57					Rco1(378)-Rco1(365)	9	5.66777e-07	GQYSDENDKIPLTDR(9)-ETFPAVKTGSR(7)	3080.52
Sin3(1487)-Ume1(222)	1	0.397544	TSAGNQGIESETEKGK(14)-LIDNSGKIGEVLR(7)	3186.65					Rco1(378)-Rco1(458)	5	0.000240938	GQYSDENDKIPLTDR(9)-ASFKNLGSK(4)	2839.41
Sin3(1487)-Ume1(267)	1	0.478562	TSAGNQGIESETEKGK(14)-FWGNEIGKK(8)	2851.41					Rco1(378)-Rco1(463)	2	0.0310291	GQYSDENDKIPLTDR(9)-NLGSKWK(5)	2720.35
Sin3(150)-Rpd3(138)	1	5.26059e-05	FDNPLPIKAPVHTEEPK(8)-GKCDVAVNYAGGLHHAK(2)	3865.97					Rco1(477)-Rco1(565)	2	3.47325e-05	KIHHCQEDNSVNYK(1)-KLFQFQESLIDK(1)	3404.69
Sin3(417)-Rco1(623)	2	0.0123846	NVDVEFSQAISYVNKIK(15)-KLWDLK(1)	2893.57					Rco1(49)-Rco1(245)	1	0.276262	LSSQNVNYDLKR(11)-STSNASEKIFR(8)	2813.44
Sin3(430)-Rco1(660)	2	0.000235033	FADQPDIYKHFLEILQTYQR(9)-KIIESK(1)	3379.79					Rco1(49)-Rco1(52)	20	6.05186e-09	LSSQNVNYDLKR(11)-KIITSEGIER(1)	2719.46
Sin3(468)-Rco1(623)	2	0.00483816	PINEVYAQVTHLFQNAPDLLEDFKK(24)-KLWDLK(1)	3869.05					Rco1(49)-Rco1(52)	15	5.61386e-05	LSSQNVNYDLKRR(11)-KIITSEGIER(1)	2875.56
Sin3(729)-Rco1(623)	1	0.318827	NFVGYQEKTK(8)-KLWDLK(1)	2153.16					Rco1(49)-Rco1(52)	12	0.000247323	RLSSQNVNYDLKR(12)-KIITSEGIER(1)	2875.56
Sin3(800)-Rco1(52)	1	2.32451e-06	KNQYEETLFK(1)-KIITSEGIER(1)	2582.37					Rco1(49)-Rco1(52)	2	0.0825624	RLSSQNVNYDLKRR(12)-KIITSEGIER(1)	3031.66
Sin3(864)-Rco1(208)	1	0.368131	LPPGLGHTSMTIYKK(14)-KLSNIR(1)	2510.42					Rco1(49)-Rco1(87)	2	0.0137909	LSSQNVNYDLKR(11)-ELLEKDSK(5)	2535.33
Sin3(873)-Rco1(208)	3	0.00391187	VYDKER(4)-KLSNIR(1)	1676.93					Rco1(49)-Rco1(90)	4	8.88622e-06	LSSQNVNYDLKR(11)-DSKGNIIK(3)	2448.31
Sin3(896)-Rco1(52)	2	0.00531803	GFEIIDALHEHPAVTAPVVLKR(21)-KIITSEGIER(1)	3695.05					Rco1(500)-Rco1(565)	1	1.04395e-05	LINKKNQLYYEPLQK(4)-RKLFQFQESLIDK(2)	3681.04
Sin3(896)-Rco1(95)	5	0.0069453	GFEIIDALHEHPAVTAPVVLKR(21)-GNIIKLNEPSTISEDSK(5)	4394.36					Rco1(501)-Rco1(321)	2	1.07833e-06	KNQLYYEPLQK(1)-KIESNFIK(1)	2539.38
Sin3(926)-Rco1(49)	3	6.79104e-06	VFFKSLDHLGLTFK(4)-LSSQNVNYDLKR(11)	3225.73					Rco1(52)-Rco1(122)	4	4.69968e-07	KIITSEGIER(1)-GPSEKIK(5)	2041.15
Sin3(926)-Rco1(52)	2	2.03006e-09	VFFKSLDHLGLTFK(4)-KIITSEGIER(1)	2934.63					Rco1(52)-Rco1(208)	2	0.00169046	KIITSEGIER(1)-KLSNIR(1)	2013.17
Sin3(946)-Rco1(52)	1	0.000834611	LLTTKQLISEISSIK(5)-KIITSEGIER(1)	2956.72					Rco1(52)-Rco1(87)	2	0.00302495	KIITSEGIER(1)-ELLEKDSK(5)	2244.23
Sin3(946)-Ume1(126)	1	0.0755671	LLTTKQLISEISSIK(5)-WEFKGETIAK(4)	3019.7					Rco1(52)-Rco1(90)	5	8.2679e-08	KIITSEGIER(1)-DSKGNIIK(3)	2157.21
Ume1(126)-Rco1(52)	1	0.0171017	WEFKGETIAK(4)-KIITSEGIER(1)	2491.34					Rco1(608)-Rco1(617)	3	0.000284015	DIASLIYFQVSNNDKSSNNK(15)-SASKSNNLR(4)	3370.69
Ume1(205)-Eaf3(318)	1	0.503205	EKHLDNENATIK(2)-DQKPLVPIR(3)	2614.42					Rco1(608)-Rco1(623)	2	2.76765e-05	DIASLIYFQVSNNDKSSNNK(15)-KLWDLK(1)	3196.65
Ume1(267)-Sin3(1463)	2	5.09786e-12	FWGNEIGKK(8)-KWENLK(1)	2033.09					Rco1(608)-Rco1(660)	3	8.4875e-07	DIASLIYFQVSNNDKSSNNK(15)-KIIESK(1)	3111.62
Ume1(268)-Sin3(1463)	1	9.48579e-07	KPLWILNDSLDGK(1)-KWENLK(1)	2453.34					Rco1(608)-Rco1(660)	2	0.0378937	DIASLIYFQVSNNDKSSNNK(15)-KIIESKPK(1)	3336.77
Ume1(329)-Sin3(1463)	2	0.00416075	AVIALGDADAELNINQGHNKVNELFK(20)-KWENLK(1)	3747.97					Rco1(613)-Rco1(623)	3	0.000263701	SSNNKSASK(5)-KLWDLK(1)	1862
Ume1(459)-Sin3(1435)	5	4.44309e-10	EVGAAKS(6)-KELISK(1)	1515.86					Rco1(613)-Rco1(660)	4	2.85396e-06	SSNNKSASK(5)-KIIESK(1)	1776.97
									Rco1(613)-Rco1(660)	2	0.000305639	SSNNKSASK(5)-KIIESKPK(1)	2002.12
									Rco1(613)-Rco1(665)	1	6.55075e-05	SSNNKSASK(5)-IIESKPK(5)	1874.02
									Rco1(613)-Rco1(667)	2	2.50552e-07	SSNNKSASK(5)-PKEELLK(2)	1916.03
									Rco1(617)-Rco1(559)	1	0.798716	SASKSNNLR(4)-SKMVQK(2)	1833.99
									Rco1(617)-Rco1(623)	2	0.000134359	SASKSNNLR(4)-KLWDLK(1)	1916.06
									Rco1(617)-Rco1(660)	1	0.00068689	SASKSNNLR(4)-KIIESK(1)	1831.03
									Rco1(617)-Rco1(660)	4	3.63526e-08	SASKSNNLR(4)-KIIESKPK(1)	2056.18
									Rco1(617)-Rco1(665)	2	1.56613e-06	SASKSNNLR(4)-IIESKPK(5)	1928.08
									Rco1(617)-Rco1(667)	2	1.74889e-08	SASKSNNLR(4)-PKEELLK(2)	1970.09
									Rco1(623)-Rco1(660)	2	4.12651e-18	KLWDLK(1)-KIIESK(1)	1656.99
									Rco1(628)-Rco1(617)	2	4.40133e-06	LWDLKELTNVVVPNELDSIQFNDFSSDEIK(5)-SASKSNNLR(4)	4621.33
									Rco1(628)-Rco1(660)	2	0.0811816	LWDLKELTNVVVPNELDSIQFNDFSSDEIK(5)-KIIESK(1)	4362.26
									Rco1(64)-Rco1(49)	1	0.0157201	SFKNEHSNLAVEDNIPEEEPK(3)-LSSQNVNYDLKR(11)	3999.96
									Rco1(64)-Rco1(49)	2	0.423193	SFKNEHSNLAVEDNIPEEEPK(3)-LSSQNVNYDLKRR(11)	4156.06
									Rco1(64)-Rco1(52)	7	4.47392e-09	SFKNEHSNLAVEDNIPEEEPK(3)-KIITSEGIER(1)	3708.86
									Rco1(64)-Rco1(52)	6	1.23232e-07	SFKNEHSNLAVEDNIPEEEPK(3)-RKIITSEGIER(2)	3864.96
									Rco1(64)-Rco1(52)	2	0.203163	SFKNEHSNLAVEDNIPEEEPKELLEK(3)-KIITSEGIER(1)	4321.21
									Rco1(64)-Rco1(87)	5	0.0685633	SFKNEHSNLAVEDNIPEEEPK(3)-ELLEKDSK(5)	3524.73
									Rco1(653)-Rco1(617)	1	7.59949e-08	ELTNVVVPNELDSIQFNDFSSDEIKHLLYLK(25)-SASKSNNLR(4)	4733.43
									Rco1(653)-Rco1(623)	2	0.167554	ELTNVVVPNELDSIQFNDFSSDEIKHLLYLK(25)-KLWDLK(1)	4559.4
									Rco1(653)-Rco1(660)	3	7.61067e-10	ELTNVVVPNELDSIQFNDFSSDEIKHLLYLK(25)-KIIESKPK(1)	4699.51
									Rco1(653)-Rco1(667)	2	0.00106274	ELTNVVVPNELDSIQFNDFSSDEIKHLLYLK(25)-IIESKPKEELLK(7)	5183.77
									Rco1(653)-Rco1(667)	1	2.54389e-07	ELTNVVVPNELDSIQFNDFSSDEIKHLLYLK(25)-PKEELLK(2)	4613.43
									Rco1(659)-Rco1(667)	10	3.32175e-14	HLLYLKK(6)-PKEELLK(2)	1908.16
									Rco1(660)-Rco1(617)	2	0.00157186	KIIESKPKEELLK(1)-SASKSNNLR(4)	2668.52
									Rco1(665)-Rco1(617)	1	0.242609	IIESKPKEELLK(5)-SASKSNNLR(4)	2540.43
									Rco1(665)-Rco1(623)	1	2.83856e-07	IIESKPK(5)-KLWDLK(1)	1754.05
									Rco1(665)-Rco1(665)	1	0.255964	KIIESKPKEELLK(6)-IIESKPK(5)	2506.51
									Rco1(667)-Rco1(617)	1	0.0444318	IIESKPKEELLK(7)-SASKSNNLR(4)	2540.43
									Rco1(667)-Rco1(623)	1	0.00212071	IIESKPKEELLK(7)-KLWDLK(1)	2366.39
									Rco1(667)-Rco1(623)	1	7.11309e-11	PKEELLK(2)-KLWDLK(1)	1796.06
									Rco1(667)-Rco1(659)	13	1.9611e-13	IIESKPKEELLK(7)-HLLYLKK(6)	2478.49
									Rco1(667)-Rco1(660)	1	5.74767e-07	PKEELLK(2)-KIIESK(1)	1711.03
									Rco1(672)-Rco1(665)	9	1.35163e-05	EELLKFLNIENPENQSE(5)-IIESKPK(5)	2997.57
									Rco1(672)-Rco1(665)	1	0.342902	EELLKFLNIENPENQSE(5)-IIESKPKEELLK(5)	3609.91
									Rco1(87)-Rco1(52)	3	0.000504781	ELLEKDSKGNIIK(5)-RKIITSEGIER(2)	2925.66
									Rco1(90)-Rco1(52)	1	7.55092e-05	DSKGNIIKLNEPSTISEDSK(3)-RKIITSEGIER(2)	3613.93
									Rco1(90)-Rco1(52)	1	0.0081147	ELLEKDSKGNIIK(8)-RKIITSEGIER(2)	2925.66
									Rco1(95)-Rco1(117)	1	2.88219e-10	GNIIKLNEPSTISEDSK(5)-VSVTGLPLNKGPSEK(10)	3507.88
									Rco1(95)-Rco1(52)	1	6.1698e-09	GNIIKLNEPSTISEDSK(5)-KIITSEGIER(1)	3127.67
									Rco1(95)-Rco1(87)	4	0.0179298	GNIIKLNEPSTISEDSK(5)-ELLEKDSK(5)	2943.54
									Rpd3(138)-Rpd3(2)	4	2.76669e-10	GKCDVAVNYAGGLHHAK(2)-VYEATPFDPITVK(1)	3413.72
									Rpd3(14)-Rpd3(256)	15	3.312e-10	VYEATPFDPITVKPSDK(13)-SVFEPVIKK(8)	3090.66
									Rpd3(14)-Rpd3(256)	3	0.010776	VYEATPFDPITVKPSDKR(13)-SVFEPVIKK(8)	3246.77
									Rpd3(14)-Rpd3(256)	9	0.009487	VYEATPFDPITVKPSDKRR(13)-SVFEPVIKK(8)	3402.87
									Rpd3(18)-Rpd3(60)	6	7.60035e-07	VYEATPFDPITVKPSDKR(17)-KMEIYR(1)	3039.59
									Rpd3(2)-Rpd3(138)	3	1.00277e-16	VYEATPFDPITVKPSDK(1)-GKCDVAVNYAGGLHHAK(2)	3840.93
									Rpd3(2)-Rpd3(138)	2	0.00123351	VYEATPFDPITVKPSDKR(1)-GKCDVAVNYAGGLHHAK(2)	3997.03
									Rpd3(2)-Rpd3(256)	1	4.36446e-07	VYEATPFDPITVK(1)-SVFEPVIKK(8)	2663.46
									Rpd3(2)-Rpd3(256)	2	1.51724e-07	VYEATPFDPITVKPSDK(1)-SVFEPVIKK(8)	3090.66
									Rpd3(2)-Rpd3(256)	1	0.000107185	VYEATPFDPITVKPSDKRR(1)-SVFEPVIKK(8)	3402.87
									Rpd3(412)-Rpd3(138)	2	2.05466e-06	DAEDLGDVEEDSAEAKDTK(16)-GKCDVAVNYAGGLHHAK(2)	3970.82
									Sin3(1037)-Sin3(1011)	4	0.000252408	IEESLYSHKQNVSESSGSDDGSSIASR(9)-LKDLLK(2)	3735.86
									Sin3(1056)-Sin3(1307)	1	0.656392	KRPYQQEMSLLDILHR(1)-IEFDKR(5)	2971.58
									Sin3(1086)-Sin3(1307)	1	0.173914	SNDEDGKVPQLSEPPEEEPNTIEEEELIDEEAK(7)-IEFDKR(5)	4683.18
									Sin3(1205)-Sin3(1170)	1	0.0893563	DLDLLSSQLSEMGLDFVGEDAYKQVLR(23)-VTKEINTR(3)	4139.12
									Sin3(1235)-Sin3(1170)	11	3.13929e-07	QAYNNKAFK(6)-VTKEINTR(3)	2181.17
									Sin3(1281)-Sin3(1271)	3	2.18192e-05	NASTTSAKDQIIYR(8)-TAEIMALFVKDR(10)	3098.62
									Sin3(1281)-Sin3(1328)	4	3.19918e-05	NASTTSAKDQIIYR(8)-EPKADEDK(3)	2636.3
									Sin3(1325)-Sin3(1281)	2	2.36622e-07	TLHVSIQYIALDDLTLKEPK(17)-NASTTSAKDQIIYR(8)	4002.14
									Sin3(1325)-Sin3(972)	1	0.0001854	TLHVSIQYIALDDLTLKEPK(17)-PKSQLDFDFPDK(2)	3871.04
									Sin3(1328)-Sin3(962)	1	0.25112	EPKADEDK(3)-VDQTNKK(6)	1900.95
									Sin3(1335)-Sin3(1328)	4	0.00427661	WKYYVTSYALPHPTEGIPHEK(2)-EPKADEDK(3)	3584.76
									Sin3(1428)-Sin3(1435)	5	0.000139995	ATNKYPTIANDNTQKGMVSQK(15)-KELISK(1)	3179.66
									Sin3(1428)-Sin3(1435)	5	0.00177523	KATNKYPTIANDNTQKGMVSQK(16)-KELISK(1)	3291.76
									Sin3(1428)-Sin3(1435)	11	1.70576e-06	YPTIANDNTQKGMVSQK(11)-KELISK(1)	2749.44
									Sin3(1468)-Sin3(1435)	4	4.14135e-12	KWENLKDSIAK(6)-KELISK(1)	2186.24
									Sin3(1468)-Sin3(1435)	5	3.65051e-09	WENLKDSIAK(5)-KELISK(1)	2058.15
									Sin3(1468)-Sin3(1462)	1	0.220123	WENLKDSIAK(5)-LSMQKK(5)	2075.12
									Sin3(1473)-Sin3(1435)	4	3.69284e-07	DSIAKTSAGNQGIESETEK(5)-KELISK(1)	2819.45
									Sin3(1473)-Sin3(1463)	6	6.29201e-08	DSIAKTSAGNQGIESETEK(5)-KWENLK(1)	2919.46
									Sin3(1487)-Sin3(1435)	2	0.000106822	TSAGNQGIESETEKGK(14)-KELISK(1)	2490.29
									Sin3(1487)-Sin3(1463)	4	0.000151763	TSAGNQGIESETEKGK(14)-KWENLK(1)	2590.3
									Sin3(232)-Sin3(253)	2	5.71843e-07	DALSYLEQVKFQFSSR(10)-DFKSQAIDTPGVIER(3)	3730.9
									Sin3(679)-Sin3(962)	2	1.58368e-10	YIGNKHLYTEFLK(5)-VDQTNKK(6)	2595.38
									Sin3(714)-Sin3(729)	4	4.27595e-06	VDFYLGSNKELFTWFK(9)-NFVGYQEKTK(8)	3344.69
									Sin3(714)-Sin3(962)	2	5.26921e-08	VDFYLGSNKELFTWFK(9)-VDQTNKK(6)	2963.52
									Sin3(740)-Sin3(729)	1	0.123081	CIENIVHEKHR(9)-NFVGYQEKTK(8)	2785.41
									Sin3(809)-Sin3(922)	3	0.00102398	NQYEETLFKIEEER(9)-ELEQKVFFK(5)	3132.58
									Sin3(896)-Sin3(899)	5	2.24814e-05	GFEIIDALHEHPAVTAPVVLKR(21)-RLKQKDEEWR(3)	3937.14
									Sin3(896)-Sin3(901)	2	0.00350323	GFEIIDALHEHPAVTAPVVLKR(21)-LKQKDEEWR(4)	3781.04
									Sin3(896)-Sin3(901)	8	9.48523e-11	GFEIIDALHEHPAVTAPVVLKR(21)-QKDEEWR(2)	3539.86
									Sin3(896)-Sin3(901)	1	0.0486024	GFEIIDALHEHPAVTAPVVLKR(21)-RLKQKDEEWR(5)	3937.14
									Sin3(896)-Sin3(901)	1	0.126049	GFEIIDALHEHPAVTAPVVLKRLK(21)-QKDEEWR(2)	3781.04
									Sin3(901)-Sin3(873)	2	0.00749103	QKDEEWR(2)-VYDKER(4)	1936.94
									Sin3(922)-Sin3(914)	5	6.0969e-08	ELEQKVFFK(5)-EWNKVWR(4)	2322.23
									Sin3(936)-Sin3(1244)	4	8.31242e-10	SLDHLGLTFKQADK(10)-LYTIDKVTQSLVK(6)	3217.77
									Sin3(946)-Sin3(1328)	1	0.0672726	LLTTKQLISEISSIK(5)-EPKADEDK(3)	2742.5
									Sin3(946)-Sin3(1356)	1	0.0239735	LLTTKQLISEISSIK(5)-LKIPFLER(2)	2826.7
									Sin3(970)-Sin3(1307)	1	0.141955	IHWLTPKPK(7)-IEFDKR(5)	2064.16
									Sin3(970)-Sin3(1328)	5	1.24659e-05	IHWLTPKPK(7)-EPKADEDK(3)	2188.16
									Sin3(970)-Sin3(962)	3	0.00901777	IHWLTPKPK(7)-VDQTNKK(6)	2089.18
									Sin3(972)-Sin3(962)	2	8.51701e-09	PKSQLDFDFPDK(2)-VDQTNKK(6)	2406.22
									Sin3(972)-Sin3(963)	3	3.00496e-09	PKSQLDFDFPDK(2)-KIHWLTPK(1)	2596.38
									Ume1(197)-Ume1(222)	2	3.60056e-05	PCVDFAISNDSKTLTVTK(12)-LIDNSGKIGEVLR(7)	3546.87
									Ume1(215)-Ume1(203)	2	4.46288e-07	HLDNENATIKLIDNSGK(10)-TLTVTKEK(6)	2938.57
									Ume1(236)-Ume1(203)	2	0.078606	TIPVPGIKNIQEIK(8)-TLTVTKEK(6)	2606.54
									Ume1(236)-Ume1(205)	20	4.34009e-07	TIPVPGIKNIQEIK(8)-EKHLDNENATIK(2)	3098.71
									Ume1(447)-Ume1(459)	4	3.23965e-09	PFTGKVLDGSR(5)-EVGAAKS(6)	1975.05
									Ume1(94)-Ume1(459)	1	0.626959	KPESISEPLVQPDYTMESQK(1)-EVGAAKS(6)	3104.53
